# Supplementary material for: The Endochitinase of Clonostachysrosea Expression in Bacillus amyloliquefaciens Enhances the Botrytis cinerea Resistance of Tomato
Source: MDPI journal article supplement (doi:10.3390/ijms19082221), 2018-07-30
Supplement: s1 [file s1]

**Table S1.** PCR Primer sequences.

| Gene                 | Sequences (5' to 3')           |
|----------------------|--------------------------------|
| <i>ech42 forward</i> | TATCTAGACGTGCCACTCCTCGTATGGAGG |
| <i>ech42 reverse</i> | CCCCCGGGGGAGAGGCTGTTCTTGAT     |

**Table S2.** Bacterial and fungal strains used in this study.

| Strain                                | Source                                                       |
|---------------------------------------|--------------------------------------------------------------|
| <i>Bacillus amyloliquefaciens</i>     | Tomato Research Institute, Northeast Agricultural University |
| <i>Clonostachys rosea</i>             | Tomato Research Institute, Northeast Agricultural University |
| <i>E. coli DH5<math>\alpha</math></i> | Tomato Research Institute, Northeast Agricultural University |
| <i>Botrytis cinerea</i>               | Tomato Research Institute, Northeast Agricultural University |
| <i>Colletotrichum coccodes</i>        | Tomato Research Institute, Northeast Agricultural University |
| <i>Pythium aphanidermatum</i>         | Tomato Research Institute, Northeast Agricultural University |
| <i>Sclerotinia sclerotiorum</i>       | Tomato Research Institute, Northeast Agricultural University |
| <i>Fusarium oxysporum</i>             | Tomato Research Institute, Northeast Agricultural University |
| <i>Fusarium verticillioide</i>        | Tomato Research Institute, Northeast Agricultural University |

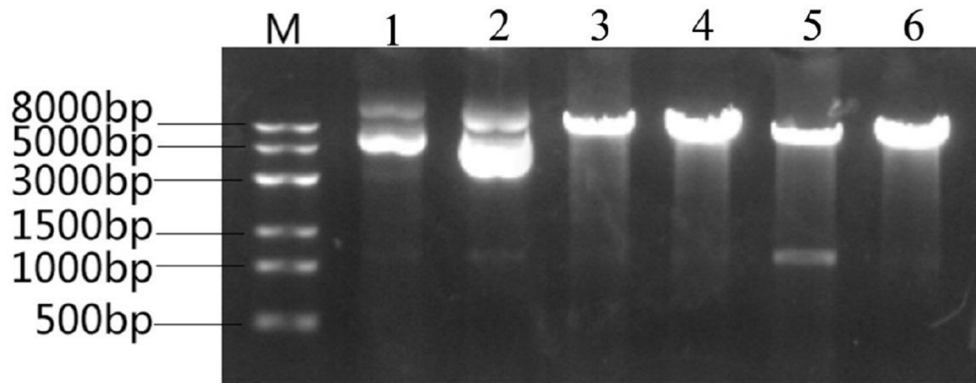

**Figure S1.** Construction and verification of vector pHT43-ech42 by single/double digestion. Lanes: M: Markers of molecular weight; 1. plasmid pHT43-ech42 without digestion; 2. plasmid pHT43. without digestion; 3. plasmid pHT43-ech42 digested with XbaI; 4. plasmid pHT43

digested with XbaI; 5. plasmid pHT43-ech42 digested with XbaI and SmaI; 6. plasmid pHT43 digested with XbaI and SmaI.

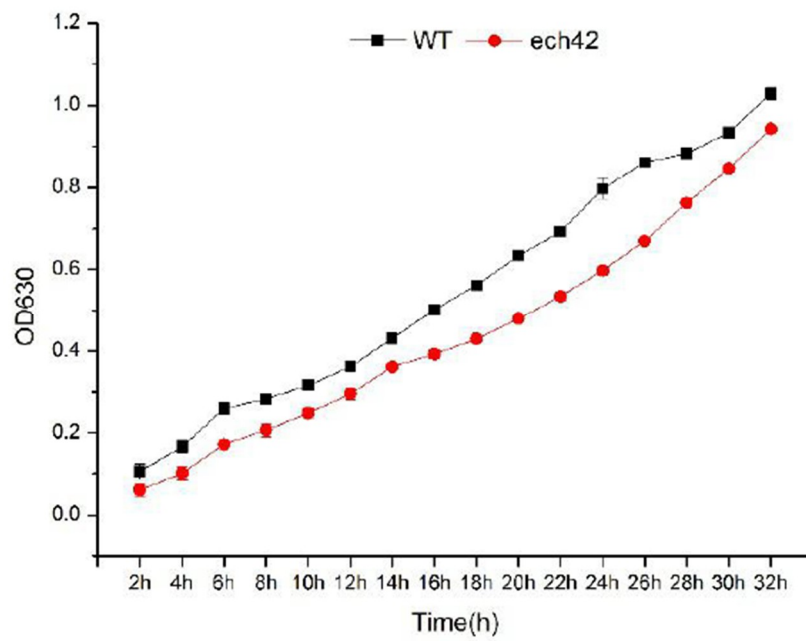

**Figure S2.** Growth curves of wild type *B. amyloliquefaciens* and *B. amyloliquefaciens*-ech42.
